# Supplementary material for: Population Genomic Analysis Reveals a Rich Speciation and Demographic History of Orang-utans (Pongo pygmaeus and Pongo abelii)
Source: PubMed Central journal article supplement (PMC3806739; doi:10.1371/journal.pone.0077175), 2013-10-23
Supplement: pone.0077175.s001.pdf [file pone.0077175.s001.pdf]

Population genomic analysis reveals a rich speciation  
and demographic history of orang-utans (*Pongo  
pygmaeus and Pongo abelii*)

Xin Ma, Joanna L. Kelley, Kirsten Eilertson, Shaila Musharoff,  
Jeremiah D. Degenhardt, Andre L. Martins, Tomas Vinar, Carolin Kosiol,  
Adam Siepel, Ryan N. Gutenkust, Carlos D. Bustamante

## Supplementary Figures

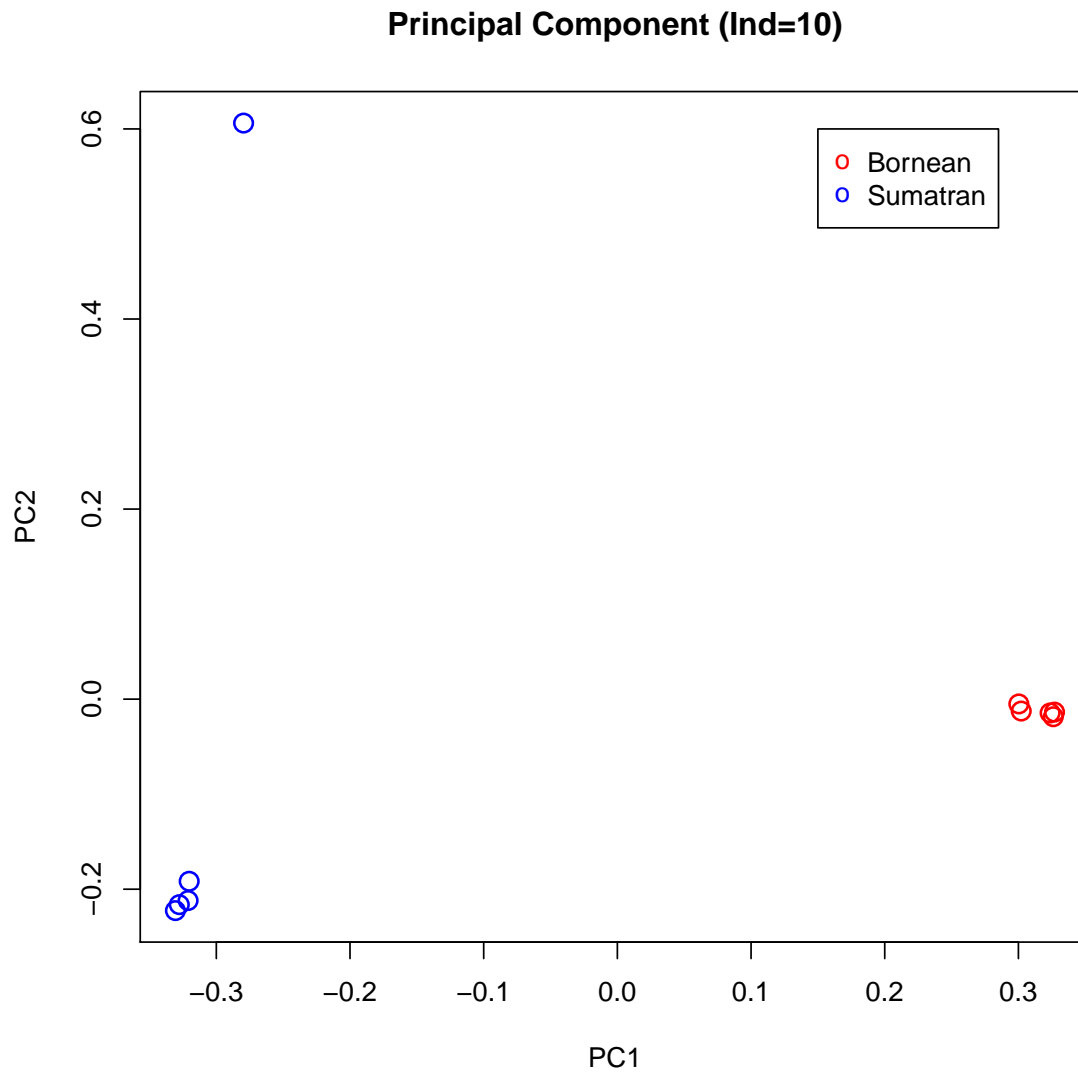

Figure S1: PCA on autosomal SNPs called from the short-read sequencing data for 10 resequenced individuals.

### SFS for Synonymous/NonSynonymous Substitution(raw counts)

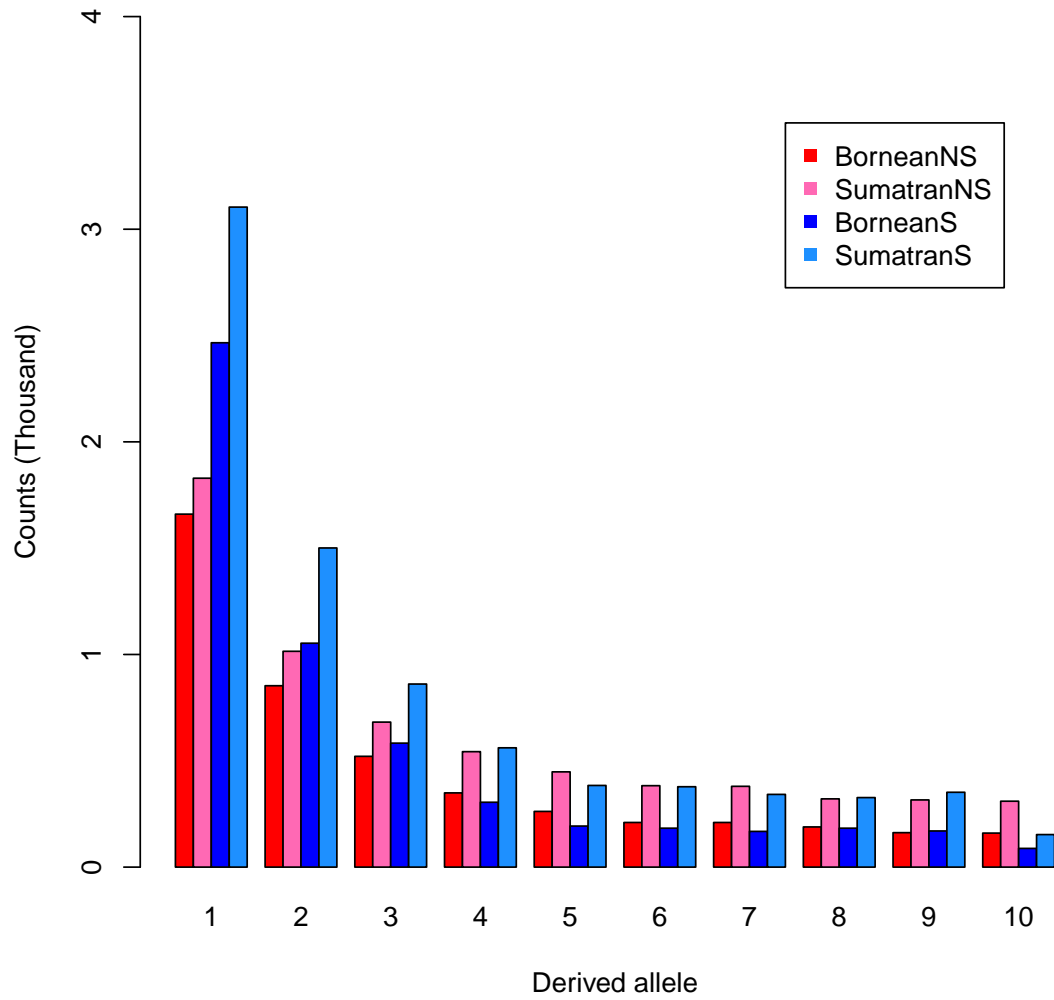

Figure S2: Summary of SFS distribution for raw SNP counts for synonymous and non-synonymous substitutions.

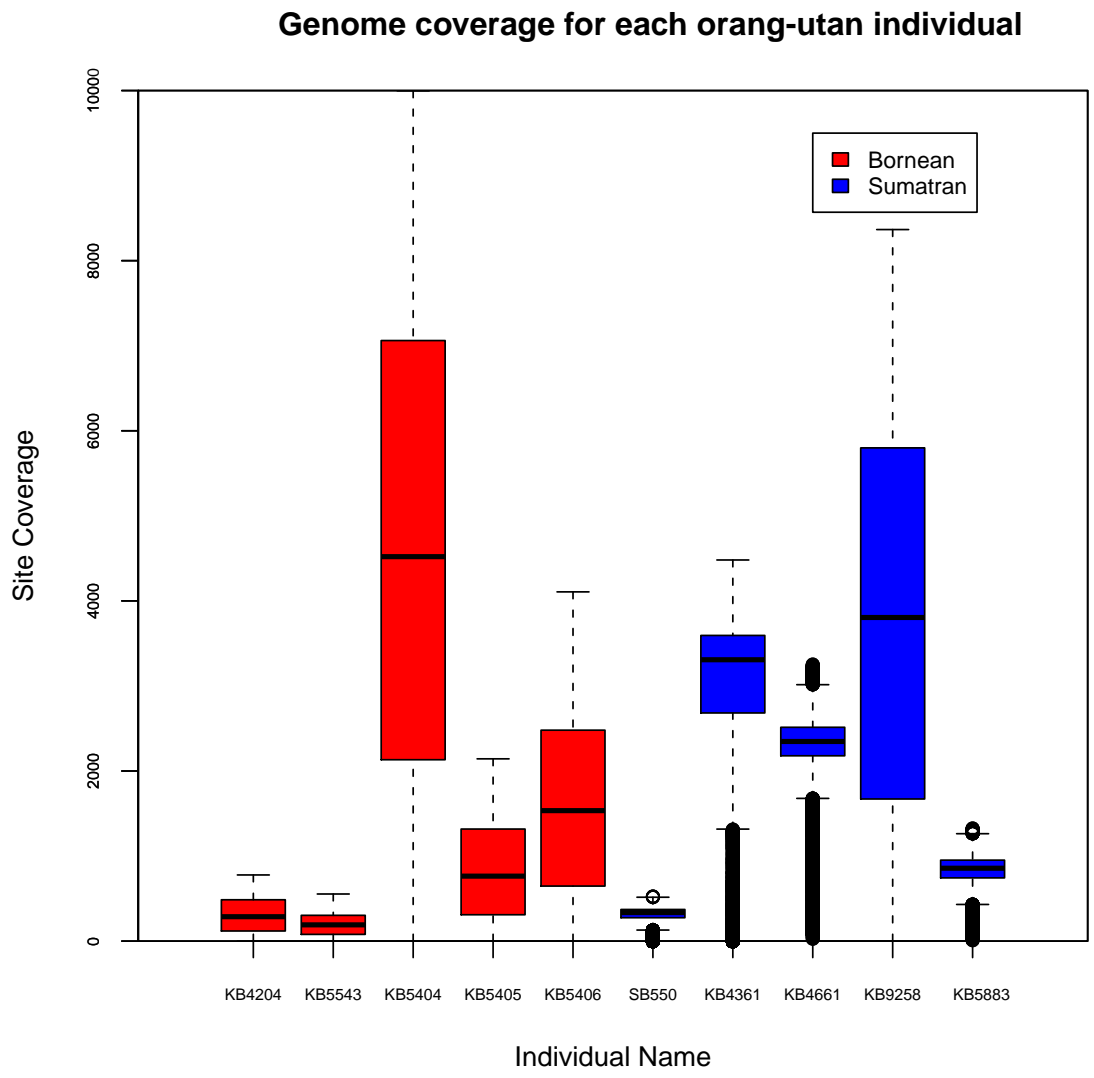

Figure S3: Boxplot of distribution of the mtDNA genome coverages for the 10 resequenced individuals.

## Supplementary Tables

Table S1: Distribution of SNPs by population and functional class from PolyPhen-2.

|                     | Benign | Possibly | Probably | Total |
|---------------------|--------|----------|----------|-------|
| Private to Bornean  | 413    | 130      | 155      | 698   |
| Private to Sumatran | 416    | 108      | 142      | 666   |
| Shared              | 214    | 45       | 88       | 347   |
| Total               | 1043   | 283      | 385      | 1711  |

Table S2: Parameters for input demographic models. All three models are variations of the Isolation-with-migration model originally fit to the autosomal data [1]. Parameters are as follows.  $N_A$  is the size of the ancestral population. Divergence occurred  $2 * N_A * T$  generations in the past, with a fraction  $s_B$  of the ancestral population forming the initial Bornean population and a fraction  $(1 - s_B)$  forming the initial Sumatran population. The Bornean population then shrank exponentially to a size  $v_B N_A$  while the Sumatran population grew to a size  $v_S N_A$ . Ongoing migration is such that each generation a fraction  $m_{B \leftarrow S} / (2N_A)$  of individuals in the Bornean population were new migrants from the Sumatran population, and vice versa for  $m_{S \leftarrow B}$ .

| model     | $s_B$ | $v_B$ | $v_S$     | $T$   | $m_{B \leftarrow S}$ | $m_{S \leftarrow B}$ | $N_A$  | $LL$       | $LL$                |
|-----------|-------|-------|-----------|-------|----------------------|----------------------|--------|------------|---------------------|
|           |       |       |           |       |                      |                      |        | synonymous | non-coding          |
| full      | 0.592 | 0.491 | 2.100     | 0.562 | 0.395                | 0.239                | 17,934 | -286.0     | $-1.62 \times 10^5$ |
| no-mig    | 0.601 | 0.423 | 2.389     | 0.326 | 0                    | 0                    | 19,445 | -330.8     | $-2.82 \times 10^5$ |
| no-growth | 0.344 | $s_B$ | $1 - s_B$ | 0.234 | 0                    | 0                    | 22,359 | -369.3     | $-3.97 \times 10^5$ |

Table S3: Inferred parameters for single- $\gamma$  selection models

| selection model                | distribution                                                              | param     | demographic model    |          |           | no 9528 full |
|--------------------------------|---------------------------------------------------------------------------|-----------|----------------------|----------|-----------|--------------|
|                                |                                                                           |           | full                 | no-mig   | no-growth |              |
| neutral                        | $\Pr(\gamma = 0) = 1$                                                     | $LL$      | -6170.5              | -6221.86 | -6328.4   | -2632.6      |
|                                | $\Pr(\gamma = k) = 1$                                                     | $LL$      | -1396.8              | -1510.8  | -1073.5   | -668.9       |
| fixed (pt mass)                |                                                                           | $k$       | -3.1                 | -3.1     | -3.5      | -3.1         |
| exponential                    | $\Pr(\gamma = -x) = \text{EXP}(\lambda)$                                  | $LL$      | -648.7               | -739.5   | -521.7    | -367.9       |
| neutral + lethal               | $\Pr(\gamma = 0) = p^0; \Pr(\gamma = -\infty) = 1 - p^0$                  | $\lambda$ | 10.2                 | 10.6     | 11.5      | 10.1         |
|                                |                                                                           | $LL$      | -313.3               | -365.0   | -471.6    | -216.9       |
| normal                         | $\Pr(\gamma = x) = \text{NORM}(\mu, \sigma)$                              | $p^0$     | 0.28                 | 0.28     | 0.28      | 0.28         |
|                                |                                                                           | $LL$      | -389.8               | -402.9   | -318.5    | -253.1       |
|                                |                                                                           | $\mu$     | -16.4                | -17.2    | -19.4     | -16.9        |
|                                |                                                                           | $\sigma$  | 12.0                 | 13.1     | 14.8      | 12.5         |
| pt mass + lethal               | $\Pr(\gamma = k) = p; \Pr(\gamma = -\infty) = 1 - p$                      | $LL$      | -257.05              | -313.2   | -307.9    | -195.9       |
| exponential + lethal           | $\Pr(\gamma = -x) = p \text{EXP}(\lambda); \Pr(\gamma = -\infty) = 1 - p$ | $p$       | 0.36 (0.34, 0.37)    | 0.35     | 0.43      | 0.35         |
|                                |                                                                           | $k$       | -0.85 (-0.99, -0.72) | -0.83    | -1.46     | -0.82        |
|                                |                                                                           | $LL$      | -259.0               | -314.3   | -307.9    | -197.0       |
| exponential + neutral          | $\Pr(\gamma = -x) = p \text{EXP}(\lambda); \Pr(\gamma = 0) = 1 - p$       | $\lambda$ | 1.05                 | 1.00     | 2.5       | 0.96         |
|                                |                                                                           | $p$       | 0.36                 | 0.35     | 0.46      | 0.35         |
|                                |                                                                           | $LL$      | -279.9               | -326.2   | -321.6    | -208.7       |
| gamma                          | $\Pr(\gamma = -x) = \text{GAMMA}(\alpha, \beta)$                          | $\lambda$ | 126.4                | 133.7    |           | 172.0        |
|                                |                                                                           | $p$       | 0.235                | 0.233    | 0.180     | 0.244        |
|                                |                                                                           | $LL$      | -268.7               | -319.2   | -313.0    | -202.8       |
| neutral + pt mass + lethal     | $\Pr(\gamma = 0) = p^0;$                                                  | $\alpha$  | 0.16                 | 0.16     | 0.28      | 0.15         |
|                                | $\Pr(\gamma = k) = p;$                                                    | $\beta$   | 14392                | 18725    | 547       | 27515        |
|                                | $\Pr(\gamma = -\infty) = 1 - p^0 - p$                                     | $LL$      | -257.1               | -313.2   | -308.0    | -195.9       |
| neutral + gamma                | $\Pr(\gamma = 0) = p^0;$                                                  | $p^0$     | 0.02                 | 0        | 0.03      | 0            |
|                                | $\Pr(\gamma = -x) = (1 - p^0) \text{GAMMA}(\alpha, \beta)$                | $p$       | 0.34                 | 0.35     | 0.40      | 0.35         |
|                                |                                                                           | $k$       | -0.91                | -0.84    | -1.61     | -0.81        |
| neutral + exponential + lethal | $\Pr(\gamma = 0) = p^0;$                                                  | $LL$      | -269.0               | -319.3   | -313.3    | -203.1       |
|                                | $\Pr(\gamma = -x) = (1 - p^0) \text{EXP}(\lambda);$                       | $p^0$     | 0.01                 | 0.01     | 0.00      | 0            |
|                                | $\Pr(\gamma = -\infty) = p$                                               | $\alpha$  | 0.16                 | 0.17     | 0.31      | 0.15         |
| normal + lethal                | $\Pr(\gamma = 0) = p^0;$                                                  | $\beta$   | 13988                | 13662    | 316       | 18285        |
|                                | $\Pr(\gamma = -x) = (1 - p^0 - p) \text{EXP}(\lambda);$                   | $LL$      | -259.0               | -314.5   | -707.9    | -197.1       |
|                                | $\Pr(\gamma = -\infty) = p$                                               | $p^0$     | 0.00                 | 0.02     | 0         | 0            |
| normal + lethal                | $\Pr(\gamma = x) = p \text{NORM}(\mu, \sigma)$                            | $\lambda$ | 1.08                 | 1.11     | 2.54      | 0.99         |
|                                | $\Pr(\gamma = -\infty) = 1 - p$                                           | $p$       | 0.65                 | 0.64     | 0.54      | 0.64         |
|                                |                                                                           | $LL$      | -257.4               | -293.2   | -307.8    | -196.1       |
|                                |                                                                           | $\mu$     | 0.36                 | 0.43     | 0.44      | 0.35         |
|                                |                                                                           | $\sigma$  | -0.84                | -4.11    | -1.81     | -0.81        |
|                                |                                                                           |           | 0.01                 | 6.45     | 1.15      | 0.01         |

Table S4: Inferred parameters for multiple- $\gamma$  models

| selection model  | distribution                                                                                            | param | demographic model   |                  | no 9258 full |
|------------------|---------------------------------------------------------------------------------------------------------|-------|---------------------|------------------|--------------|
|                  |                                                                                                         |       | full                | no-mig no-growth |              |
| 3 fixed          | $\Pr(\gamma_A = k_A, \gamma_B = k_B, \gamma_S = k_S) = 1$                                               | $LL$  | -836.2              |                  |              |
|                  |                                                                                                         | $k_A$ | -0.23               |                  |              |
|                  |                                                                                                         | $k_B$ | -5.64               |                  |              |
|                  |                                                                                                         | $k_S$ | -6.78               |                  |              |
| 2 fixed + lethal | $\Pr(\gamma_A = (k_B + k_S)/2, \gamma_B = k_B, \gamma_S = k_S) = p;$<br>$\Pr(\gamma = -\infty) = 1 - p$ | $LL$  | -241.7              | -286.4           | -279.5       |
|                  |                                                                                                         | $k_B$ | -0.32               | 0.03             | -0.33        |
|                  |                                                                                                         | $k_S$ | -1.35               | -1.69            | -2.52        |
|                  |                                                                                                         | $p$   | 0.36                | 0.36             | 0.43         |
|                  |                                                                                                         |       |                     |                  |              |
| 3 fixed + lethal | $\Pr(\gamma_A = k_A, \gamma_B = k_B, \gamma_S = k_S) = p;$<br>$\Pr(\gamma = -\infty) = 1 - p$           | $LL$  | -227.4              | -185.6           | -168.3       |
|                  |                                                                                                         | $k_A$ | 0.89 (0.40,1.32)    | 1.29             | 0.611        |
|                  |                                                                                                         | $k_B$ | -3.97 (-4.57,-2.95) | -8.15            | -11.71       |
|                  |                                                                                                         | $k_S$ | -4.32 (-4.85,-3.51) | -8.43            | -12.09       |
|                  |                                                                                                         | $p$   | 0.42 (0.39,0.44)    | 0.44             | 0.52         |

Table S5: Enriched GO MF (Molecular Function) categories under negative selection. Only categories with at least 10 genes and Fisher's exact test P-value < 0.05 are listed.

| GO.ID      | Term                                                    | Annotated | Significant | Expected | Fisher's P |
|------------|---------------------------------------------------------|-----------|-------------|----------|------------|
| GO:0005515 | protein binding                                         | 645       | 296         | 255.53   | 8.6e-6     |
| GO:0001882 | nucleoside binding                                      | 150       | 84          | 59.43    | 1.4e-5     |
| GO:0001883 | purine nucleoside binding                               | 150       | 84          | 59.43    | 1.4e-5     |
| GO:0000166 | nucleotide binding                                      | 196       | 105         | 77.65    | 1.5e-5     |
| GO:0030554 | adenyl nucleotide binding                               | 149       | 83          | 59.03    | 2.1e-5     |
| GO:0008134 | transcription factor binding                            | 28        | 22          | 11.09    | 2.6e-5     |
| GO:0003712 | transcription cofactor activity                         | 20        | 17          | 7.92     | 3.7e-5     |
| GO:0017076 | purine nucleotide binding                               | 177       | 95          | 70.12    | 3.8e-5     |
| GO:0005488 | binding                                                 | 1164      | 491         | 461.15   | 4.1e-5     |
| GO:0005524 | ATP binding                                             | 136       | 74          | 53.88    | 0.00018    |
| GO:0032559 | adenyl ribonucleotide binding                           | 137       | 74          | 54.28    | 0.00024    |
| GO:0003713 | transcription coactivator activity                      | 12        | 11          | 4.75     | 0.00027    |
| GO:0032553 | ribonucleotide binding                                  | 165       | 86          | 65.37    | 0.00038    |
| GO:0032555 | purine ribonucleotide binding                           | 165       | 86          | 65.37    | 0.00038    |
| GO:0004714 | transmembrane receptor protein tyrosine kinase activity | 11        | 10          | 4.36     | 0.00064    |
| GO:0019199 | transmembrane receptor protein kinase activity          | 11        | 10          | 4.36     | 0.00064    |
| GO:0005216 | ion channel activity                                    | 29        | 20          | 11.49    | 0.00119    |
| GO:0015267 | channel activity                                        | 29        | 20          | 11.49    | 0.00119    |
| GO:0022803 | passive transmembrane transporter activity              | 29        | 20          | 11.49    | 0.00119    |
| GO:0022838 | substrate specific channel activity                     | 29        | 20          | 11.49    | 0.00119    |
| GO:0046873 | metal ion transmembrane transporter activity            | 29        | 20          | 11.49    | 0.00119    |
| GO:0005261 | cation channel activity                                 | 24        | 17          | 9.51     | 0.00180    |
| GO:0016563 | transcription activator activity                        | 24        | 17          | 9.51     | 0.00180    |
| GO:0022836 | gated channel activity                                  | 26        | 18          | 10.3     | 0.00199    |
| GO:0004672 | protein kinase activity                                 | 58        | 34          | 22.98    | 0.00220    |
| GO:0003723 | RNA binding                                             | 52        | 31          | 20.6     | 0.00238    |
| GO:0016301 | kinase activity                                         | 76        | 42          | 30.11    | 0.00333    |
| GO:0016740 | transferase activity                                    | 166       | 82          | 65.77    | 0.00425    |

Continued on next page



**Table S5 – continued from previous page**

| GO.ID      | Term                                                                    | Annotated | Significant | Expected | Fisher's P |
|------------|-------------------------------------------------------------------------|-----------|-------------|----------|------------|
| GO:0005509 | calcium ion binding                                                     | 109       | 56          | 43.18    | 0.00648    |
| GO:0030695 | GTPase regulator activity                                               | 40        | 24          | 15.85    | 0.00659    |
| GO:0060589 | nucleoside-triphosphatase<br>regulator activity                         | 40        | 24          | 15.85    | 0.00659    |
| GO:0030955 | potassium ion binding                                                   | 13        | 10          | 5.15     | 0.00698    |
| GO:0016773 | phosphotransferase activity,<br>alcohol group as acceptor               | 70        | 38          | 27.73    | 0.00774    |
| GO:0005244 | voltage-gated ion channel ac-<br>tivity                                 | 15        | 11          | 5.94     | 0.00831    |
| GO:0022832 | voltage-gated channel activ-<br>ity                                     | 15        | 11          | 5.94     | 0.00831    |
| GO:0022843 | voltage-gated cation channel<br>activity                                | 15        | 11          | 5.94     | 0.00831    |
| GO:0016772 | transferase activity, transfer-<br>ring phosphorus-containing<br>groups | 91        | 47          | 36.05    | 0.01096    |
| GO:0022891 | substrate-specific transmem-<br>brane transporter activity              | 78        | 41          | 30.9     | 0.01183    |
| GO:0030145 | manganese ion binding                                                   | 12        | 9           | 4.75     | 0.01390    |
| GO:0003824 | catalytic activity                                                      | 505       | 220         | 200.07   | 0.01461    |
| GO:0015075 | ion transmembrane trans-<br>porter activity                             | 68        | 36          | 26.94    | 0.01564    |
| GO:0005249 | voltage-gated potassium<br>channel activity                             | 14        | 10          | 5.55     | 0.01583    |
| GO:0005267 | potassium channel activity                                              | 14        | 10          | 5.55     | 0.01583    |
| GO:0022857 | transmembrane transporter<br>activity                                   | 86        | 44          | 34.07    | 0.01680    |
| GO:0008237 | metallopeptidase activity                                               | 18        | 12          | 7.13     | 0.01808    |
| GO:0005083 | small GTPase regulator activ-<br>ity                                    | 28        | 17          | 11.09    | 0.01848    |
| GO:0008047 | enzyme activator activity                                               | 28        | 17          | 11.09    | 0.01848    |
| GO:0008324 | cation transmembrane trans-<br>porter activity                          | 54        | 29          | 21.39    | 0.02295    |
| GO:0008233 | peptidase activity                                                      | 52        | 28          | 20.6     | 0.02421    |
| GO:0015276 | ligand-gated ion channel ac-<br>tivity                                  | 15        | 10          | 5.94     | 0.03087    |
| GO:0016564 | transcription repressor activ-<br>ity                                   | 15        | 10          | 5.94     | 0.03087    |

Continued on next page

**Table S5 – continued from previous page**

| GO.ID      | Term                                       | Annotated | Significant | Expected | Fisher's P |
|------------|--------------------------------------------|-----------|-------------|----------|------------|
| GO:0022834 | ligand-gated channel activity              | 15        | 10          | 5.94     | 0.03087    |
| GO:0004713 | protein tyrosine kinase activity           | 21        | 13          | 8.32     | 0.03149    |
| GO:0031420 | alkali metal ion binding                   | 17        | 11          | 6.73     | 0.03155    |
| GO:0005085 | guanyl-nucleotide exchange factor activity | 19        | 12          | 7.53     | 0.03171    |
| GO:0005096 | GTPase activator activity                  | 19        | 12          | 7.53     | 0.03171    |

Table S6: Enriched GO BP (Biological Process) categories under negative selection. Only categories with at least 10 genes and Fisher's exact test P-value < 0.05 are listed.

| GO.ID      | Term                                                   | Annotated | Significant | Expected | Fisher's P |
|------------|--------------------------------------------------------|-----------|-------------|----------|------------|
| GO:0048731 | system development                                     | 158       | 93          | 63.94    | 5.2e-7     |
| GO:0007399 | nervous system development                             | 65        | 45          | 26.3     | 1.5e-6     |
| GO:0007275 | multicellular organismal development                   | 211       | 114         | 85.38    | 1.0e-5     |
| GO:0048856 | anatomical structure development                       | 180       | 99          | 72.84    | 1.6e-5     |
| GO:0007242 | intracellular signaling cascade                        | 133       | 76          | 53.82    | 3.2e-5     |
| GO:0044267 | cellular protein metabolic process                     | 235       | 119         | 95.09    | 0.00033    |
| GO:0019538 | protein metabolic process                              | 241       | 120         | 97.52    | 0.00077    |
| GO:0007167 | enzyme linked receptor protein signaling pathway       | 36        | 24          | 14.57    | 0.00116    |
| GO:0048523 | negative regulation of cellular process                | 110       | 60          | 44.51    | 0.00130    |
| GO:0007517 | muscle organ development                               | 13        | 11          | 5.26     | 0.00141    |
| GO:0007165 | signal transduction                                    | 314       | 150         | 127.06   | 0.00165    |
| GO:0007154 | cell communication                                     | 347       | 164         | 140.42   | 0.00172    |
| GO:0048519 | negative regulation of biological process              | 120       | 64          | 48.56    | 0.00194    |
| GO:0008361 | regulation of cell size                                | 26        | 18          | 10.52    | 0.00262    |
| GO:0006813 | potassium ion transport                                | 17        | 13          | 6.88     | 0.00270    |
| GO:0044265 | cellular macromolecule catabolic process               | 28        | 19          | 11.33    | 0.00285    |
| GO:0043687 | post-translational protein modification                | 92        | 50          | 37.23    | 0.00371    |
| GO:0032502 | developmental process                                  | 300       | 142         | 121.4    | 0.00373    |
| GO:0016051 | carbohydrate biosynthetic process                      | 14        | 11          | 5.67     | 0.00417    |
| GO:0019941 | modification-dependent protein catabolic process       | 14        | 11          | 5.67     | 0.00417    |
| GO:0043632 | modification-dependent macromolecule catabolic process | 14        | 11          | 5.67     | 0.00417    |
| GO:0044257 | cellular protein catabolic process                     | 14        | 11          | 5.67     | 0.00417    |

Continued on next page

**Table S6 – continued from previous page**

| GO.ID                  | Term                                                             | Annotated | Significant | Expected | Fisher's P |
|------------------------|------------------------------------------------------------------|-----------|-------------|----------|------------|
| GO:0051603             | proteolysis involved in cellular protein catabolic process       | 14        | 11          | 5.67     | 0.00417    |
| GO:0007169             | transmembrane receptor protein tyrosine kinase signaling pathway | 27        | 18          | 10.93    | 0.00495    |
| GO:0015672             | monovalent inorganic cation transport                            | 33        | 21          | 13.35    | 0.00553    |
| GO:0007264             | small GTPase mediated signal transduction                        | 45        | 27          | 18.21    | 0.00561    |
| GO:0043170             | macromolecule metabolic process                                  | 571       | 254         | 231.06   | 0.00571    |
| GO:0032269             | negative regulation of cellular protein metabolic process        | 11        | 9           | 4.45     | 0.00630    |
| GO:0032501             | multicellular organismal process                                 | 337       | 156         | 136.37   | 0.00717    |
| GO:0010646             | regulation of cell communication                                 | 56        | 32          | 22.66    | 0.00744    |
| GO:0034962             | cellular biopolymer catabolic process                            | 22        | 15          | 8.9      | 0.00756    |
| GO:0009966             | regulation of signal transduction                                | 52        | 30          | 21.04    | 0.00788    |
| GO:0016049             | cell growth                                                      | 24        | 16          | 9.71     | 0.00805    |
| GO:0006511             | ubiquitin-dependent protein catabolic process                    | 13        | 10          | 5.26     | 0.00831    |
| GO:0034637             | cellular carbohydrate biosynthetic process                       | 13        | 10          | 5.26     | 0.00831    |
| GO:0031325             | positive regulation of cellular metabolic process                | 26        | 17          | 10.52    | 0.00844    |
| GO:0051179             | localization                                                     | 277       | 130         | 112.09   | 0.00854    |
| GO:0010604             | positive regulation of macromolecule metabolic process           | 30        | 19          | 12.14    | 0.00890    |
| GO:0009893             | positive regulation of metabolic process                         | 32        | 20          | 12.95    | 0.00902    |
| GO:0048513             | organ development                                                | 115       | 59          | 46.54    | 0.00911    |
| GO:0003012             | muscle system process                                            | 15        | 11          | 6.07     | 0.00998    |
| GO:0044260             | cellular macromolecule metabolic process                         | 556       | 246         | 224.99   | 0.01016    |
| GO:0044248             | cellular catabolic process                                       | 57        | 32          | 23.07    | 0.01057    |
| Continued on next page |                                                                  |           |             |          |            |

**Table S6 – continued from previous page**

| GO.ID                  | Term                                                    | Annotated | Significant | Expected | Fisher's P |
|------------------------|---------------------------------------------------------|-----------|-------------|----------|------------|
| GO:0046467             | membrane lipid biosynthetic process                     | 10        | 8           | 4.05     | 0.01303    |
| GO:0001558             | regulation of cell growth                               | 21        | 14          | 8.5      | 0.01317    |
| GO:0008285             | negative regulation of cell proliferation               | 23        | 15          | 9.31     | 0.01374    |
| GO:0051056             | regulation of small GTPase mediated signal transduction | 23        | 15          | 9.31     | 0.01374    |
| GO:0006928             | cell motion                                             | 39        | 23          | 15.78    | 0.01377    |
| GO:0051674             | localization of cell                                    | 39        | 23          | 15.78    | 0.01377    |
| GO:0022008             | neurogenesis                                            | 29        | 18          | 11.73    | 0.01447    |
| GO:0006464             | protein modification process                            | 122       | 61          | 49.37    | 0.01614    |
| GO:0051248             | negative regulation of protein metabolic process        | 12        | 9           | 4.86     | 0.01622    |
| GO:0044255             | cellular lipid metabolic process                        | 67        | 36          | 27.11    | 0.01678    |
| GO:0006793             | phosphorus metabolic process                            | 107       | 54          | 43.3     | 0.01868    |
| GO:0006796             | phosphate metabolic process                             | 107       | 54          | 43.3     | 0.01868    |
| GO:0006468             | protein amino acid phosphorylation                      | 61        | 33          | 24.68    | 0.01920    |
| GO:0032940             | secretion by cell                                       | 16        | 11          | 6.47     | 0.02042    |
| GO:0007243             | protein kinase cascade                                  | 38        | 22          | 15.38    | 0.02092    |
| GO:0016043             | cellular component organization                         | 213       | 100         | 86.19    | 0.02176    |
| GO:0045786             | negative regulation of cell cycle                       | 20        | 13          | 8.09     | 0.02250    |
| GO:0006811             | ion transport                                           | 79        | 41          | 31.97    | 0.02262    |
| GO:0040008             | regulation of growth                                    | 22        | 14          | 8.9      | 0.02299    |
| GO:0044237             | cellular metabolic process                              | 701       | 302         | 283.66   | 0.02301    |
| GO:0034960             | cellular biopolymer metabolic process                   | 546       | 239         | 220.94   | 0.02321    |
| GO:0043069             | negative regulation of programmed cell death            | 24        | 15          | 9.71     | 0.02322    |
| GO:0060548             | negative regulation of cell death                       | 24        | 15          | 9.71     | 0.02322    |
| GO:0032268             | regulation of cellular protein metabolic process        | 26        | 16          | 10.52    | 0.02325    |
| GO:0007155             | cell adhesion                                           | 88        | 45          | 35.61    | 0.02359    |
| Continued on next page |                                                         |           |             |          |            |

**Table S6 – continued from previous page**

| GO.ID      | Term                                                                | Annotated | Significant | Expected | Fisher's P |
|------------|---------------------------------------------------------------------|-----------|-------------|----------|------------|
| GO:0022610 | biological adhesion                                                 | 88        | 45          | 35.61    | 0.02359    |
| GO:0051239 | regulation of multicellular or-<br>ganismal process                 | 49        | 27          | 19.83    | 0.02484    |
| GO:0008152 | metabolic process                                                   | 749       | 321         | 303.09   | 0.02493    |
| GO:0043412 | biopolymer modification                                             | 129       | 63          | 52.2     | 0.02657    |
| GO:0009987 | cellular process                                                    | 1130      | 470         | 457.26   | 0.02769    |
| GO:0016310 | phosphorylation                                                     | 91        | 46          | 36.82    | 0.02820    |
| GO:0048522 | positive regulation of cellular<br>process                          | 78        | 40          | 31.56    | 0.03041    |
| GO:0006629 | lipid metabolic process                                             | 87        | 44          | 35.2     | 0.03125    |
| GO:0030001 | metal ion transport                                                 | 37        | 21          | 14.97    | 0.03126    |
| GO:0051093 | negative regulation of devel-<br>opmental process                   | 37        | 21          | 14.97    | 0.03126    |
| GO:0006936 | muscle contraction                                                  | 13        | 9           | 5.26     | 0.03402    |
| GO:0007601 | visual perception                                                   | 31        | 18          | 12.54    | 0.03439    |
| GO:0008610 | lipid biosynthetic process                                          | 31        | 18          | 12.54    | 0.03439    |
| GO:0050953 | sensory perception of light<br>stimulus                             | 31        | 18          | 12.54    | 0.03439    |
| GO:0043283 | biopolymer metabolic pro-<br>cess                                   | 555       | 241         | 224.58   | 0.03583    |
| GO:0005976 | polysaccharide metabolic<br>process                                 | 15        | 10          | 6.07     | 0.03596    |
| GO:0016568 | chromatin modification                                              | 15        | 10          | 6.07     | 0.03596    |
| GO:0048699 | generation of neurons                                               | 27        | 16          | 10.93    | 0.03616    |
| GO:0048870 | cell motility                                                       | 27        | 16          | 10.93    | 0.03616    |
| GO:0006810 | transport                                                           | 240       | 110         | 97.12    | 0.03648    |
| GO:0051234 | establishment of localization                                       | 240       | 110         | 97.12    | 0.03648    |
| GO:0010628 | positive regulation of gene<br>expression                           | 17        | 11          | 6.88     | 0.03708    |
| GO:0010557 | positive regulation of macro-<br>molecule biosynthetic pro-<br>cess | 19        | 12          | 7.69     | 0.03759    |
| GO:0007156 | homophilic cell adhesion                                            | 21        | 13          | 8.5      | 0.03765    |
| GO:0009891 | positive regulation of biosyn-<br>thetic process                    | 21        | 13          | 8.5      | 0.03765    |
| GO:0008283 | cell proliferation                                                  | 66        | 34          | 26.71    | 0.04122    |
| GO:0042127 | regulation of cell prolifera-<br>tion                               | 40        | 22          | 16.19    | 0.04221    |

Continued on next page

**Table S6 – continued from previous page**

| GO.ID      | Term                                    | Annotated | Significant | Expected | Fisher's P |
|------------|-----------------------------------------|-----------|-------------|----------|------------|
| GO:0044262 | cellular carbohydrate metabolic process | 40        | 22          | 16.19    | 0.04221    |
| GO:0048468 | cell development                        | 40        | 22          | 16.19    | 0.04221    |
| GO:0044238 | primary metabolic process               | 686       | 293         | 277.59   | 0.04791    |

## References

- [1] D. P. Locke, L. W. Hillier, W. C. Warren, K. C. Worley, L. V. Nazareth, D. M. Muzny, S. P. Yang, Z. Wang, A. T. Chinwalla, P. Minx, M. Mitreva, L. Cook, K. D. Delehaunty, C. Fronick, H. Schmidt, L. A. Fulton, R. S. Fulton, J. O. Nelson, V. Magrini, C. Pohl, T. A. Graves, C. Markovic, A. Cree, H. H. Dinh, J. Hume, C. L. Kovar, G. R. Fowler, G. Lunter, S. Meader, A. Heger, C. P. Ponting, T. Marques-Bonet, C. Alkan, L. Chen, Z. Cheng, J. M. Kidd, E. E. Eichler, S. White, S. Searle, A. J. Vilella, Y. Chen, P. Flicek, J. Ma, B. Raney, B. Suh, R. Burhans, J. Herrero, D. Haussler, R. Faria, O. Fernando, F. Darre, D. Farre, E. Gazave, M. Oliva, A. Navarro, R. Roberto, O. Capozzi, N. Archidiacono, G. Della Valle, S. Purgato, M. Rocchi, M. K. Konkel, J. A. Walker, B. Ullmer, M. A. Batzer, A. F. Smit, R. Hubley, C. Casola, D. R. Schrider, M. W. Hahn, V. Quesada, X. S. Puente, G. R. Ordonez, C. Lopez-Otin, T. Vinar, B. Brejova, A. Ratan, R. S. Harris, W. Miller, C. Kosiol, H. A. Lawson, V. Taliwal, A. L. Martins, A. Siepel, A. Roychoudhury, X. Ma, J. Degenhardt, C. D. Bustamante, R. N. Gutenkunst, T. Mailund, J. Y. Dutheil, A. Hobolth, M. H. Schierup, O. A. Ryder, Y. Yoshinaga, P. J. de Jong, G. M. Weinstock, J. Rogers, E. R. Mardis, R. A. Gibbs, et al. Comparative and demographic analysis of orang-utan genomes. *Nature*, 469(7331):529–33, 2011.
